# Supplementary material for: A Systematic Follow-Up of Mycobacterium tuberculosis Drug-Resistance and Associated Genotypic Lineages in the French Departments of the Americas over a Seventeen-Year Period
Source: Biomed Res Int. 2014 Mar 13;2014:689852. doi: 10.1155/2014/689852 (PMC3971487; doi:10.1155/2014/689852)
Supplement: Supplementary file 1 — Detailed listing of the spoligotype patterns obtained for the 1239 Mycobacterium tuberculosis complex (MTBC) strains, split into 2 separate tables showing patterns obtained for drug susceptible (n = 1086; Supplemental Table S1) and drug-resistant isolates (n = 153; Supplemental Table S1). Each pattern is listed by its frequency of isolation; the tables also provide the corresponding lineage, SIT number, and proportion (%) in the study. Note that percentages were calculated relative to the total number of drug susceptible isolates in Table S1 and relative to the total number of drug resistant isolates in Table S2. Orphan profiles indicate patterns that were unique in the SITVIT2 database. [file 689852.f1.pdf]

**SUPPLEMENTAL TABLE S1:** Spoligotypes obtained for drug susceptible *M. tuberculosis* isolates (n=1086).

[illegible]

[illegible]

\* Percentages calculated relative to the total number of drug susceptible isolates.

\*\* Orphan profiles, i.e. profiles that were unique in the SITVIT2 database.

**SUPPLEMENTAL TABLE S2:** Spoligotypes obtained for *M. tuberculosis* isolates displaying antibiotic resistance (n= 153).

[illegible]

\* Percentages calculated relative to the total number of drug resistant isolates.

\*\* Orphan profiles, i.e. profiles that were unique in the SITVIT2 database.
